# Supplementary material for: Impact of Cluster Thinning on Wine Grape Yield and Fruit Composition: A Review and Meta-Analysis
Source: Hindawi journal article supplement (doi:10.1155/2024/2504396), 2024-01-24
Supplement: f1 [file 2504396.f1.docx]

**Title:** Impact of cluster thinning on wine grape yield and fruit composition: A review and meta-analysis

**Running Title:** Review of cluster thinning effects on grape quality.

Joshua VanderWeidea,b* ([jvander@msu.edu](mailto:jvander@msu.edu)), Esmaeil Nasrollahiazarc ([nasroll2@msu.edu](mailto:nasroll2@msu.edu)), Steve Schultzed ([schultze@southalabama.edu](mailto:schultze@southalabama.edu)), Paolo Sabbatinib ([sabbatin@msu.edu](mailto:sabbatin@msu.edu)), and Simone Castellarina ([simone.castellarin@ubc.ca](mailto:simone.castellarin@ubc.ca))

aWine Research Centre, Faculty of Land and Food Systems, The University of British Columbia, Vancouver, BC, Canada

bDepartment of Horticulture, Michigan State University, East Lansing, MI 48824, USA

cMichigan State University Extension, Leelanau County, MI 49682, USA

dDepartment of Earth Sciences, University of South Alabama, Mobile, AL, 36688, USA

*Corresponding author: Joshua VanderWeide ([jvander@msu.edu](mailto:jvander@msu.edu))

**Supplementary Data**

**Supplementary Table 1.** Climatic classification of observations used in the analysis.

| **Class #** | **Classification** | **Region/City** | **Country** | **Climate Data Source** |
| --- | --- | --- | --- | --- |
| 1 | Hot | Badajoz | Spain | NCDC |
| 1 | Hot | Podgorica | Montenegro | Hydrological and Meteorological Service of Montenegro |
| 1 | Hot | Guadajira | Spain | NCDC |
| 1 | Hot | Podunavlje | Croatia | Datameteo |
| 1 | Hot | Foggia | Italy | Datameteo |
| 1 | Hot | Moixent | Spain | Agencia Estatal de Meteologia |
| 1 | Hot | Udine | Italy | NCDC |
| 1 | Hot | Resuttano | Italy | NCDC |
| 1 | Hot | University of Adelaide | Australia | NCDC |
| 2 | Warm / Dry | Tebano | Italy | Datameteo |
| 2 | Warm / Dry | Prosser | USA | NCDC |
| 2 | Warm / Dry | Erzincan | Turkey | NCDC |
| 2 | Warm / Dry | Tekirdağ | Turkey | NCDC |
| 2 | Warm / Dry | Zafferana Etnea | Italy | Datameteo |
| 2 | Warm / Dry | Valencia | Spain | Agencia Estatal de Meteologia |
| 2 | Warm / Dry | Requena | Spain | Agencia Estatal de Meteologia |
| 2 | Warm / Dry | Barossa Valley | Australia | NCDC |
| 2 | Warm / Dry | Prokuplje | Serbia | NCDC |
| 2 | Warm / Dry | Central Po Valley | Italy | Datameteo |
| 2 | Warm / Dry | Ancona | Italy | Datameteo |
| 2 | Warm / Dry | Mandi´cevac | Croatia | Datameteo |
| 2 | Warm / Dry | West Po Valley | Italy | Datameteo |
| 2 | Warm / Dry | Arezzo | Italy | Datameteo |
| 2 | Warm / Dry | Perugia | Italy | Datameteo |
| 2 | Warm / Dry | Hormilla | Spain | NCDC |
| 2 | Warm / Dry | Torre del Colle | Italy | Datameteo |
| 3 | Warm / Wet | Colli Piacentini | Italy | Datameteo |
| 3 | Warm / Wet | Benton Harbor | USA | NCDC |
| 3 | Warm / Wet | Bologna | Italy | NCDC |
| 3 | Warm / Wet | Val d’Illasi | Italy | Datameteo |
| 3 | Warm / Wet | Shenandoah Valley | USA | NCDC |
| 3 | Warm / Wet | Winchester | USA | NCDC |
| 3 | Warm / Wet | Andreas | USA | NCDC |
| 3 | Warm / Wet | Pully | Switzerland | MeteoSwiss |
| 3 | Warm / Wet | Lewisburg | USA | NCDC |
| 3 | Warm / Wet | Oslavio | Italy | Datameteo |
| 3 | Warm / Wet | Castelvecchio | Italy | Datameteo |
| 3 | Warm / Wet | Slap | Slovenia | NCDC |
| 4 | Cool | Salem | Oregon | NCDC |
| 4 | Cool | Dayton | Oregon | NCDC |
| 4 | Cool | Ollauri | Spain | NCDC |
| 4 | Cool | Koreniki | Croatia | NCDC |
| 4 | Cool | Potoce | Slovenia | NCDC |
| 4 | Cool | Szczecin | Poland | NCDC |

**Supplementary Table 2.** Pearson’s correlation coefficient analysis between yield parameters and berry weight and fruit quality parameters by timing of cluster thinning.

|  |  |  | **Bloom (B)a** | |  | **Pea-size (PS)** | |  | **Lag Phase (LP)** | |  | **Veraison (V)** | | |
| --- | --- | --- | --- | --- | --- | --- | --- | --- | --- | --- | --- | --- | --- | --- |
| **Parameter** |  |  | **Yield** | **LA:Y** |  | **Yield** | **LA:Y** |  | **Yield** | **LA:Y** |  | **Yield** | **LA:Y** | |
| ***Production Parameters*** |  |  |  |  |  |  |  |  |  |  |  |  |  | |
| Berry Weight (g) | *r* |  | -0.171 | -0.839 |  | 0.204 | -0.128 |  | -0.076 | 0.401 |  | **0.285** | -0.127 | |
| *p-value* |  | *0.268* | *0.076* |  | *0.103* | *0.918* |  | *0.744* | *0.251* |  | ***0.012*** | *0.617* | |
| *n* |  | 41 | 5 |  | 65 | 3 |  | 21 | 10 |  | 77 | 18 | |
| ***Fruit Quality Parameters*** |  |  |  |  |  |  |  |  |  |  |  |  |  | |
| Total Soluble Solids (°Brix) | *r* |  | -0.128 | 0.311 |  | -0.181 | 0.082 |  | -0.332 | 0.272 |  | **-0.226** | **0.625** | |
| *p-value* |  | *0.397* | *0.610* |  | *0.082* | *0.862* |  | *0.068* | *0.346* |  | ***0.036*** | ***0.001*** | |
| *n* |  | 46 | 5 |  | 93 | 7 |  | 31 | 14 |  | 86 | 24 | |
|  | | | | | | | | | | | | | |
| pH | *r* |  | -0.126 | 0.981 |  | -0.031 | -0.096 |  | -0.329 | 0.027 |  | **-0.341** | 0.232 | |
| *p-value* |  | *0.450* | *0.124* |  | *0.793* | *0.838* |  | *0.087* | *0.933* |  | ***0.002*** | *0.287* | |
| *n* |  | 38 | 3 |  | 75 | 7 |  | 28 | 12 |  | 79 | 23 | |
|  | | | | | | | | | | | | | |
| Titratable Acidity (g/L) | *r* |  | -0.064 | -0.304 |  | 0.098 | 0.559 |  | 0.139 | **0.621** |  | 0.150 | -0.112 | |
| *p-value* |  | *0.693* | *0.619* |  | *0.374* | *0.192* |  | *0.473* | ***0.031*** |  | *0.182* | *0.610* | |
| *n* |  | 40 | 5 |  | 84 | 7 |  | 29 | 12 |  | 81 | 23 | |
|  | | | | | | | | | | | | | |
| Total Anthocyanins (mg/kg) FW berry | *r* |  | -0.047 | 0.707 |  | 0.107 | -0.116 |  | -0.458 | 0.047 |  | -0.055 | -0.125 | |
| *p-value* |  | *0.898* | *0.182* |  | *0.727* | *0.804* |  | *0.135* | *0.913* |  | *819* | *0.813* | |
| *n* |  | 10 | 5 |  | 13 | 7 |  | 12 | 8 |  | 20 | 6 | |
|  | | | | | | | | | | | | | |
| Total Anthocyanins (mg/L) | *r* |  | 0.516 | - |  | 0.081 | - |  | -0.558 | -0.472 |  | -0.145 | 0.622 | |
| *p-value* |  | *0.655* | *-* |  | *0.802* | *-* |  | *0.093* | *0.528* |  | *0.554* | *0.263* | |
| *n* |  | 3 | 0 |  | 12 | 0 |  | 10 | 4 |  | 19 | 5 | |
|  | | | | | | | | | | | | | |
| Total Phenolics (mg/kg) FW berry | *r* |  | - | - |  | - | - |  | - | -0.898 |  | - | - | |
| *p-value* |  | *-* | *-* |  | *-* | *-* |  | *-* | *0.102* |  | *-* | *-* | |
| *n* |  | 0 | 0 |  | 2 | 0 |  | 1 | 4 |  | 2 | 1 | |
|  | | | | | | | | | | | | | |
| Total Phenolics (mg/L) | *r* |  | - | - |  | -0.093 | - |  | -0.454 | 0.437 |  | -0.481 | - | |
| *p-value* |  | *-* | *-* |  | *0.907* | *-* |  | *0.546* | *0.563* |  | *0.096* | *-* | |
| *n* |  | 0 | 0 |  | 4 | 0 |  | 4 | 4 |  | 13 | 0 | |

aPearson’s correlation coefficient analysis was conducted using percentage change of CT over CN for each parameter at each respective CT timing (B, PS, LP, or V).

**Supplementary Table 3.** Pearson’s correlation coefficient analysis between yield parameters and berry weight and fruit quality parameters by severity of cluster thinning.

|  |  |  | **Low (~25%)a** | |  | **Moderate (~45%)** | |  | **High (~65%)** | |
| --- | --- | --- | --- | --- | --- | --- | --- | --- | --- | --- |
| **Parameter** |  |  | **Yield** | **LA:Y** |  | **Yield** | **LA:Y** |  | **Yield** | **LA:Y** |
| ***Production Parameters*** |  |  |  |  |  |  |  |  |  |  |
| Berry Weight (g) | *r* |  | -0.215 | -0.218 |  | **0.271** | 0.041 |  | -0.579 | - |
| *p-value* |  | *0.392* | *0.860* |  | ***0.022*** | *0.901* |  | *0.173* | *-* |
| *n* |  | 18 | 3 |  | 71 | 12 |  | 7 | 1 |
| ***Fruit Quality Parameters*** |  |  |  |  |  |  |  |  |  |  |
| Total Soluble Solids (°Brix) | *r* |  | 0.068 | 0.115 |  | -0.164 | 0.321 |  | -0.411 | - |
| *p-value* |  | *0.701* | *0.927* |  | *0.142* | *0.194* |  | *0.090* | - |
| *n* |  | 34 | 3 |  | 82 | 18 |  | 18 | 1 |
|  | | | | | | | | | | |
| pH | *r* |  | 0.122 | 0.980 |  | -0.098 | -0.264 |  | **-0.517** | - |
| *p-value* |  | *0.519* | *0.127* |  | *0.421* | *0.384* |  | ***0.028*** | *-* |
| *n* |  | 30 | 3 |  | 70 | 13 |  | 18 | 1 |
|  | | | | | | | | | | |
| Titratable Acidity (g/L) | *r* |  | 0.242 | **-0.998** |  | 0.191 | 0.187 |  | 0.243 | - |
| *p-value* |  | 0.197 | **0.041** |  | 0.101 | 0.504 |  | 0.331 | - |
| *n* |  | 30 | 3 |  | 75 | 15 |  | 18 | 1 |
|  | | | | | | | | | | |
| Total Anthocyanins (mg/kg) FW berry | *r* |  | 0.392 | - |  | -0.223 | 0.001 |  | - | - |
| *p-value* |  | 0.442 | - |  | 0.284 | 0.998 |  | - | - |
| *n* |  | 6 | 1 |  | 25 | 17 |  | 0 | 0 |
|  | | | | | | | | | | |
| Total Anthocyanins (mg/L) | *r* |  | 0.727 | - |  | -0.191 | - |  | - | - |
| *p-value* |  | 0.164 | - |  | 0.382 | - |  | - | - |
| *n* |  | 5 | 0 |  | 23 | 0 |  | 1 | 0 |
|  | | | | | | | | | | |
| Total Phenolics (mg/kg) FW berry | *r* |  | - | - |  | **1.000** | -0.828 |  | - | - |
| *p-value* |  | - | - |  | **0.017** | 0.172 |  | - | - |
| *n* |  | 1 | 1 |  | 3 | 4 |  | 0 | 0 |
|  | | | | | | | | | | |
| Total Phenolics (mg/L) | *r* |  | - | - |  | -0.481 | - |  | - | - |
| *p-value* |  | - | - |  | 0.096 | - |  | - | - |
| *n* |  | 0 | 0 |  | 13 | 0 |  | 0 | 0 |

aPearson’s correlation coefficient analysis was conducted using percentage change of CT over CN for each parameter at each respective CT severity (Low, Moderate, or High).
